# Supplementary material for: A Fast and Sensitive One-Tube SARS-CoV-2 Detection Platform Based on RTX-PCR and Pyrococcus furiosus Argonaute
Source: MDPI journal article supplement (doi:10.3390/bios14050245), 2024-05-13
Supplement: s1 [file s1]

## Supplementary

Supplementary Table 1 primers, guides and molecular beacons used in this study

| Name of the Primers,<br>guides and molecular<br>beacons                             | Sequence (5'-3')                                         |
|-------------------------------------------------------------------------------------|----------------------------------------------------------|
| Primers used for testing the reverse transcriptase and DNA polymerase of RTX (exo-) |                                                          |
| 25FAM                                                                               | 6-FAM-CCCTCGCAGCCGTCCAACCAACTCA                          |
| RT-RNA                                                                              | CGAAAACGGCAUUAUAUGAUUAUCUUGAGUUGGUUGG<br>ACGGCUGCGAGGG   |
| Blocker                                                                             | CCCTCGCAGCCGTCCAACCAACTCACAAGATATCATATAAT<br>GCCGTTTTTCG |
| ΔDNA-F                                                                              | GGCCTCTGTCGTTTCCTTTCTCTG                                 |
| ΔDNA-1R                                                                             | GGTGAGCGTGTTATCCCGGTG                                    |
| ΔDNA-2R                                                                             | CCGTAGACGGATGCCCCTTTAATG                                 |
| ΔDNA-4R                                                                             | GCATCACCGCTTCCTGAACTTC                                   |
| Primers, guides and molecular beacons used for targets of N gene                    |                                                          |
| 4-f                                                                                 | AATAAGCATATTGACGCATACAAAACATTCCCACC                      |
| 4-r                                                                                 | TCTGTCTCTGCGGTAAGGCTTGAGTTTCATC                          |
| 4-g1                                                                                | CTTTTATAGGCTCTGTT                                        |
| 4-g2                                                                                | GTCCTTTTATAGGCTCT                                        |
| 4-g3                                                                                | TTTGTCTTTTATAGGC                                         |
| 4-g4                                                                                | CTTTTGTCTTTTAA                                           |
| 4-g5                                                                                | CTTCTTTTGTCTTT                                           |
| 4-g6                                                                                | CTTCTCTTTTGTCC                                           |
| 4-g7                                                                                | AGCCTTCTCTTTTG                                           |
| 7-f                                                                                 | TCAAGCCTTACCGCAGAGACAGAAGAAACAGC                         |
| 7-r                                                                                 | GCTCATGGATTGTTGCAATTGTTTGGAGAAATCATCC                    |
| 7-g1                                                                                | AGAAGAGTCACAGTTT                                         |

|        |                                                 |
|--------|-------------------------------------------------|
| 7-g2   | GGAAGAAGAGTCACAG                                |
| 7-g3   | GCAGGAAGAAGAGTCA                                |
| 7-g4   | GCAGCAGGAAGAAGAG                                |
| 7-g5   | TCTGCAGCAGGAAGAA                                |
| ct-g   | GTTTGGTGGATGTGGA                                |
| 22-F-1 | GCAGAGACAGAAGAAACAGCAAACCTGTGACTC               |
| 22-R-1 | GCTCATGGATTGTTGCAATTGTTTGGAGAAATCATC            |
| ct-MB  | 6-FAM-tttacgCATCCACATCCACCAAACGTAATGcgtaaa-BHQ1 |
| 7-5MB  | 6-FAM-cgcaccTCCAAATCTGCAGCAGgggtgcg-BHQ1        |
| 614-F  | CAAATACTTCTAACCAGGTTGCTGTTC                     |
| 614-R  | GCAACAGGGACTTCTGTGC                             |
| gWT    | GATGTTAACCTGCACAG                               |
| gMT    | GGTGTTAACCTGCACAG                               |
| MB-614 | 5' FAM-cgcaccTATCAGGATGTTAACCTgggtgcg-BHQ1-3'   |

---

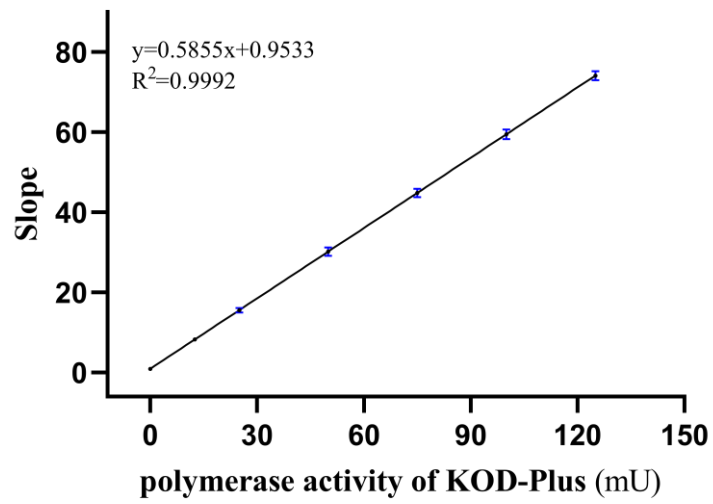

Figure S1. Titration of KOD-plus DNA Polymerase Activity determined with Eva EZ™ Fluorometric Polymerase Activity Assay Kit.

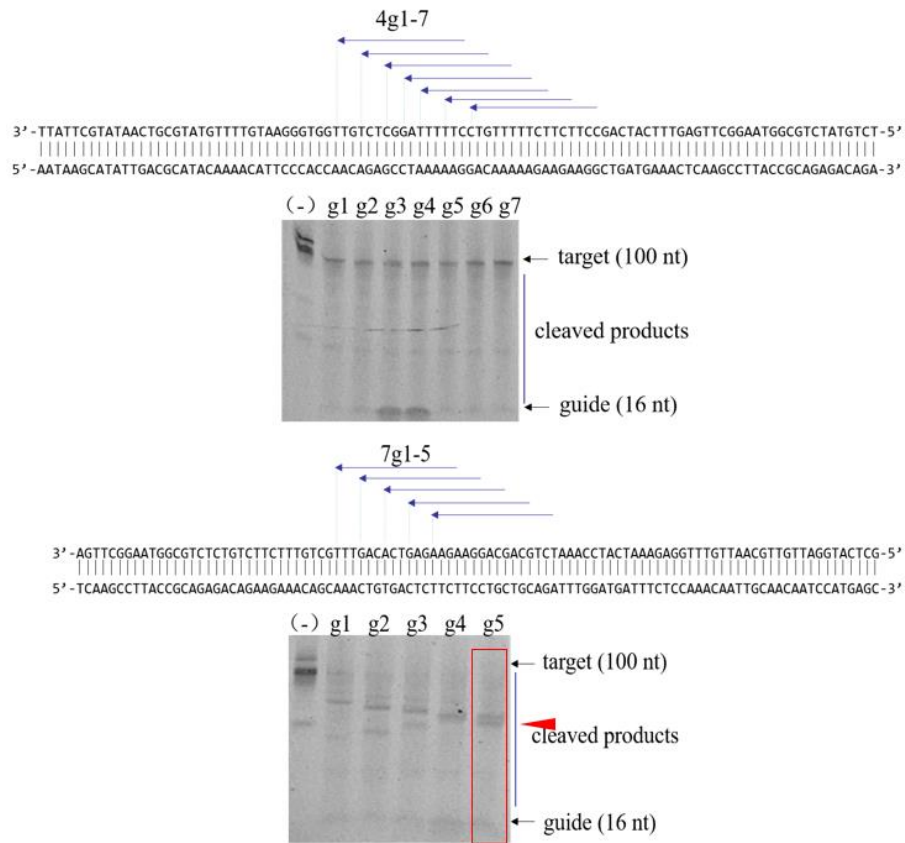

**Figure S2.** Screen analysis of input gDNA for efficient cleavage of the N gene by PfAgo. Guides 4g1-7 cover the first fragment while 7g1-5 cover the second fragment. The boundary of each guide is indicated on the top of the sequences. Urea-denaturing PAGE was performed to analyze the cleavage of the targets.
